# Supplementary material for: High-performance transparent conductive pyrolyzed carbon (Py-C) ultrathin film
Source: Royal Society of Chemistry journal article supplement (doi:10.1039/d0tc01936d), 2020-01-01
Supplement: d0tc01936d2.pdf [file d0tc01936d2.pdf]

## Supporting Information

# High-Performance Transparent Conductive Pyrolyzed Carbon (Py-C) Ultrathin Film

Monalisa Pal,<sup>a†</sup> Gilwoon Lee,<sup>a†</sup> Anupam Giri,<sup>a</sup> Kaliannan Thiyagarajan,<sup>a</sup> Kangkyun Baek,<sup>b</sup> Manish Kumar,<sup>c</sup> and Unyong Jeong<sup>a\*</sup>

---

<sup>a</sup> *Department of Materials Science and Engineering, Pohang University of Science and Technology, 77 Cheongam-Ro, Nam-Gu, Pohang 37673, Korea.*

<sup>b</sup> *Center for Self-assembly and Complexity, Institute for Basic Science, Pohang 37673, Republic of Korea.*

<sup>c</sup> *Pohang Accelerator Laboratory (PAL), Pohang University of Science and Technology, 77 Cheongam-Ro, Nam-Gu, Pohang 790-784, Korea.*

† Those authors equally contributed to this work.

[\*] Corresponding author: E-mail: [ujeong@postech.ac.kr](mailto:ujeong@postech.ac.kr)

**Table S1.** Other graphitic thin films synthesized by various processes.

|    | Journal                                      | Title                                                                                                                                       | Synthesis process                                                                                      | Sheet resistance         | Transmittance (%) at 550 nm  | Reference |
|----|----------------------------------------------|---------------------------------------------------------------------------------------------------------------------------------------------|--------------------------------------------------------------------------------------------------------|--------------------------|------------------------------|-----------|
| 1  | Small 2011, 7, 3186–3192.                    | Flexible and Transparent Electrothermal Film Heaters Based on Graphene Materials.                                                           | Thermal annealing (at 800, 900, 1000 °C)                                                               | 6,079<br>1,568<br>0.641  | 81<br>53<br>34               | [24]      |
| 2  | Appl. Surf. Sci. 2018, 435, 809–814          | Large-Area Self-Assembled Reduced Graphene Oxide/Electrochemically Exfoliated Graphene Hybrid Films for Transparent Electrothermal Heaters. | GO/EEG-HI thermal annealing at 800 °C<br><br>EEG=electrochemically exfoliated graphene                 | 89.8<br>48.9<br>5.3<br>3 | 81.4<br>76.5<br>79.7<br>76.2 | [25]      |
| 3  | Thin Solid Films 2014, 556, 13–17.           | Flexible, Transparent, and Conductive Defrosting Glass.                                                                                     | Chemical reduction with hydrazine hydrate at 800 °C                                                    | 2<br>5.37<br>10          | 24.9–<br>45<br>68.4          | [26]      |
| 4  | Adv. Funct. Mater. 2009, 19, 2577–2583.      | Evolution of Electrical, Chemical, and Structural Properties of Transparent and Conducting Chemically Derived Graphene Thin Films.          | Ar/H <sub>2</sub> annealing at 1100 °C                                                                 | 372–743312               | 46.2–96.2                    | [27]      |
| 5  | Nano Lett. 2008, 8, 323–327.                 | Transparent, Conductive Graphene Electrodes for Dye-Sensitized Solar Cells.                                                                 | Ar/H <sub>2</sub> annealing at 1100 °C                                                                 | 1800                     | 60                           | [28]      |
| 6a | ACS Nano 2008, 2, 463–470.                   | Evaluation of Solution-Processed Reduced Graphene Oxide Films as Transparent Conductors.                                                    | N <sub>2</sub> H <sub>4</sub> + thermal annealing at 400 °C                                            | 50000                    | 80                           | [29]      |
| 6b |                                              |                                                                                                                                             | Thermal annealing at 1100 °C                                                                           | 5000                     | 80                           | [29]      |
| 7  | Nat. Nanotechnol. 2008, 3, 101–105.          | Processable Aqueous Dispersions of Graphene Nanosheets.                                                                                     | N <sub>2</sub> H <sub>2</sub> reduction in solution                                                    | ~20000000                | 96                           | [30]      |
| 8  | Nat. Nanotechnol. 2008, 3, 538–542           | Highly Conducting Graphene Sheets and Langmuir–Blodgett Films.                                                                              | Langmuir–Blodgett film calcined at 350 °C                                                              | 8000–150000              | 79–92                        | [31]      |
| 9  | Nano Lett. 2015, 15, 5846–5854               | Direct Chemical Vapor Deposition-Derived Graphene Glasses Targeting Wide Ranged Applications                                                | atmospheric-pressure CVD                                                                               | 1700–6100                | 57–92                        | [32]      |
| 10 | Nat. Nanotechnol. 5, 574–578 (2010).         | Roll-to-roll production of 30-inch graphene films for transparent electrodes.                                                               | CVD over Cu foil                                                                                       | 275                      | 97.4                         | [14]      |
| 11 | Nature 457, 706–710 (2009)                   | Large-scale pattern growth of graphene films for stretchable transparent electrodes.                                                        | CVD over Ni                                                                                            | 290–700                  | 76.3–83.7                    | [33]      |
| 12 | Science Advances 2016, 2                     | Ultra-smooth glassy graphene thin films for flexible transparent circuits.                                                                  | PEI+Glucose spin coat over quartz, Annealing 1000°C, ramping 2°C/min, reannealing using Ni, at 850 °C. | 1000                     | 89                           | [5]       |
| 13 | Nanoscale Res Lett 2016, 11, 54–54.          | Ultra-thin Graphitic Film: Synthesis and Physical Properties.                                                                               | CVD on Cu foil at 1000 °C                                                                              | 1150                     | 75                           | [9]       |
| 14 | Applied Surface Science 256 (2010) 6186–6190 | Transparent ultrathin conducting carbon films                                                                                               | Thermal annealing of negative PR AZ nLOF 2070 at 1000°C                                                | 11000                    | 80                           | [18]      |

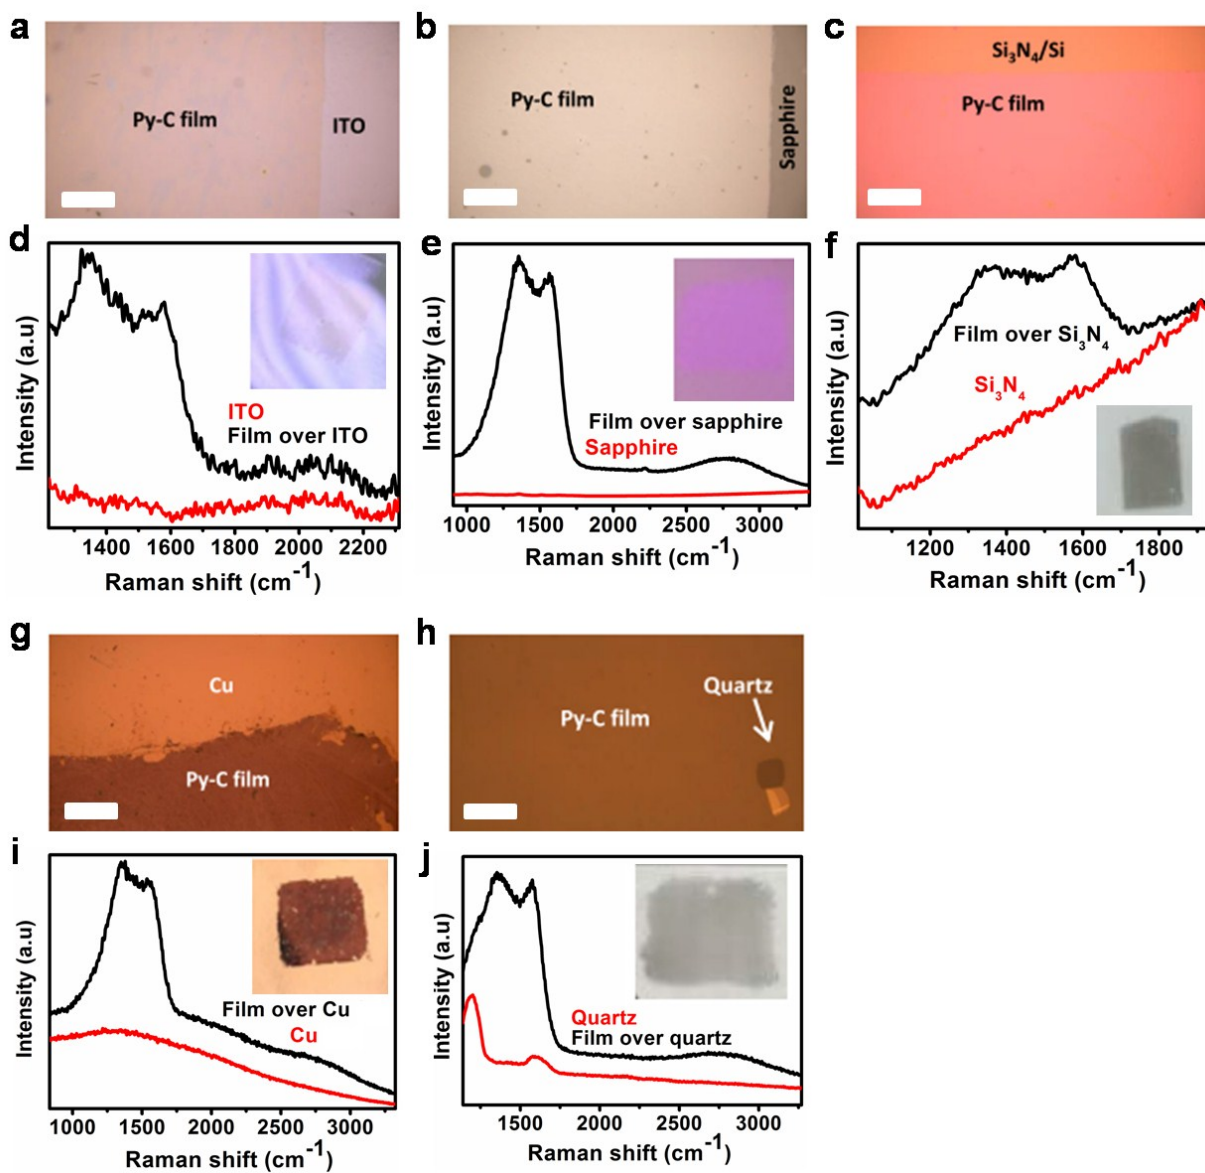

**Figure S1:** (a), (b), (c), (g), and, (h) OM image, (d), (e), (f), (i), and, (j) Raman spectra of Py-C film grown over ITO, sapphire, Si<sub>3</sub>N<sub>4</sub> /Si, Cu, and quartz. Scale bar in OM images is 500  $\mu\text{m}$ . Inset shows the camera images of the Py-C film grown over each substrate.

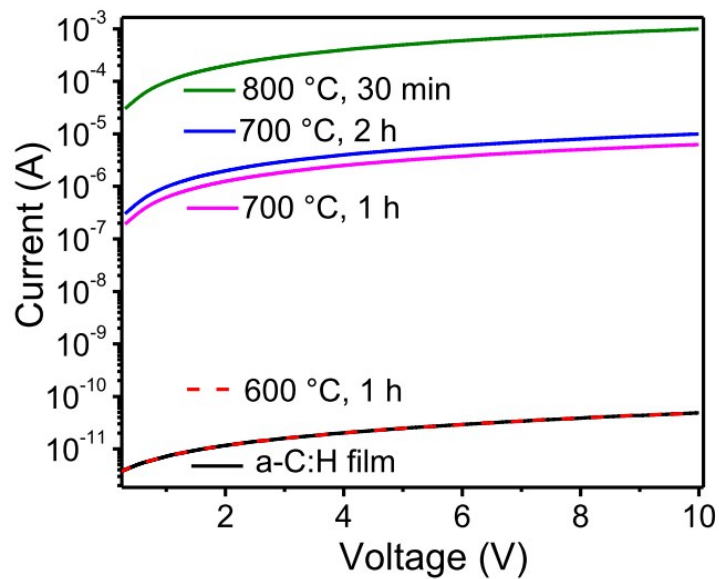

**Figure S2:** Optimization of annealing temperature and time for the conversion of a-C:H film to Py-C film.

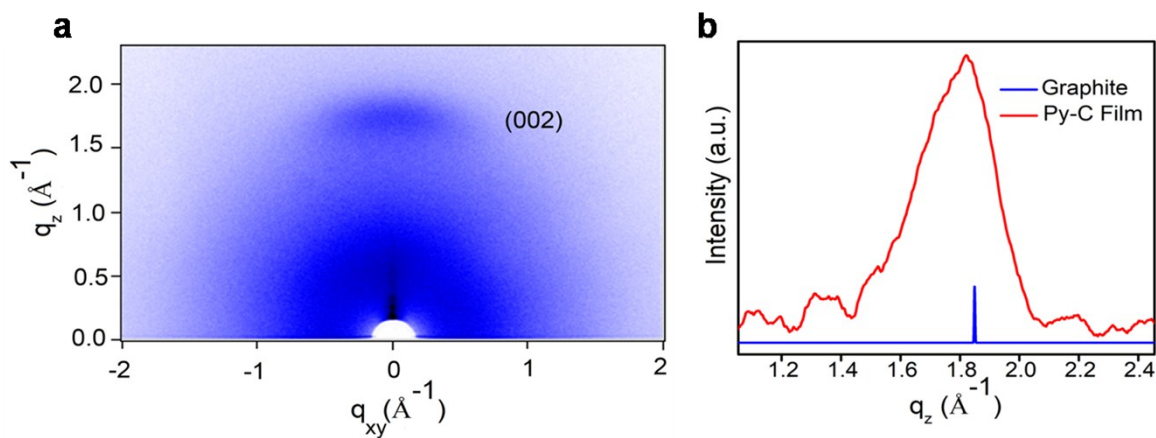

**Figure S3:** (a) Two-dimensional grazing-incident X-ray diffraction (GIXRD) image of Py-C film. (b) Comparative one-dimensional XRD pattern of Py-C film and graphite.

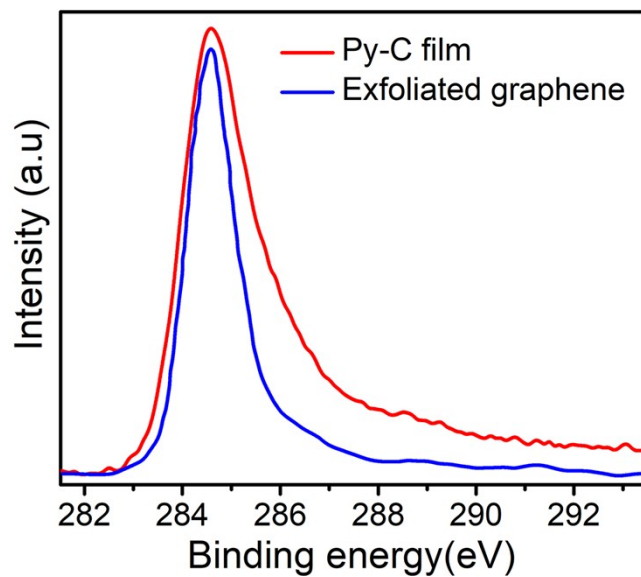

**Figure S4:** Comparative C1s XPS spectrum of the Py-C film and exfoliated graphene..

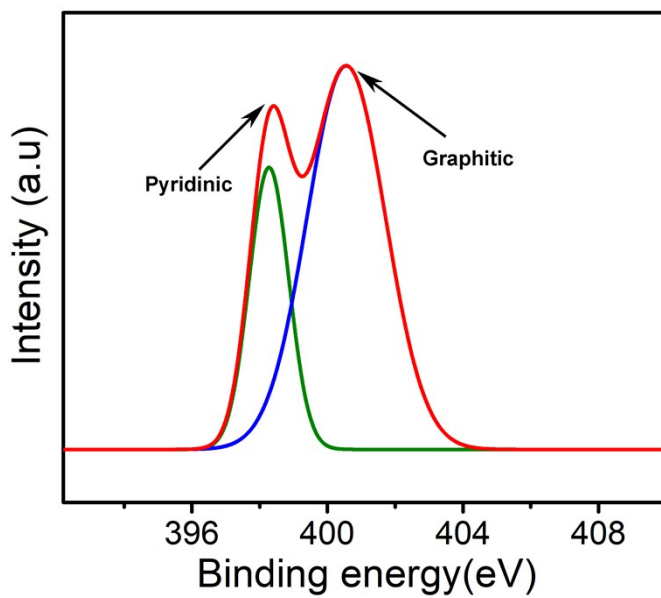

**Figure S5:** N1s XPS spectrum of Py-C film.

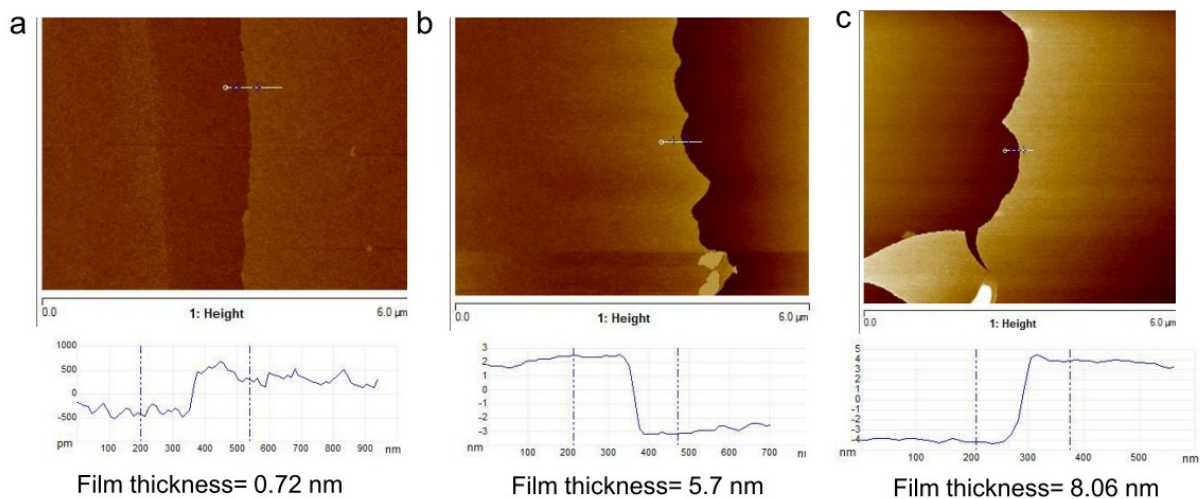

**Figure S6:** AFM images of Py-C films of different thickness.

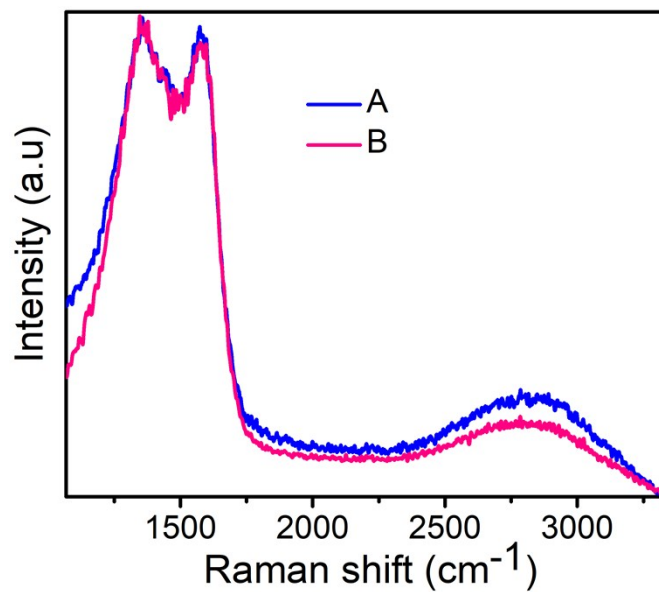

**Figure S7:** Raman spectra obtained from film over  $\text{SiO}_2/\text{Si}$  (A) and suspended film (B)..

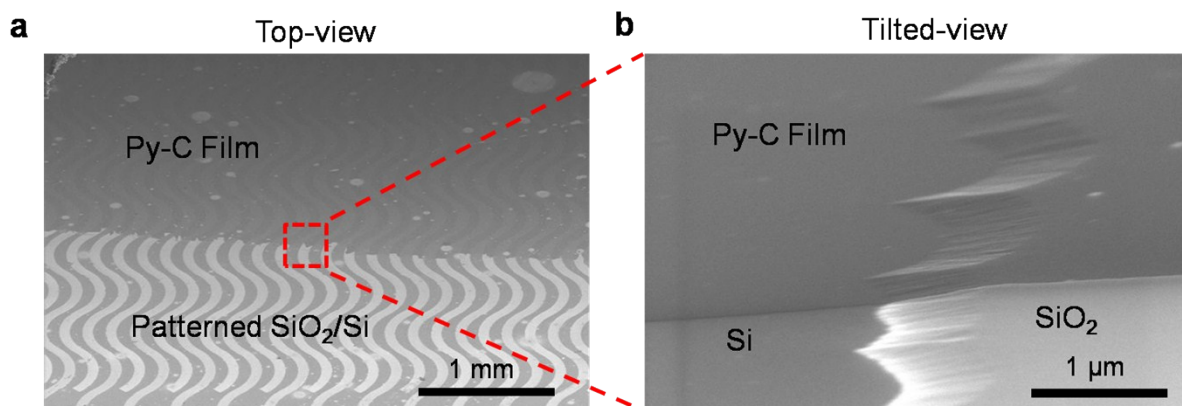

**Figure S8:** (a) Top-view SEM image of Py-C film grown over patterned SiO<sub>2</sub>/Si wafer with trench width 100 μm and height 100 nm. (b) High resolution tilted-view SEM image of the marked area in (a), indicated by red box.

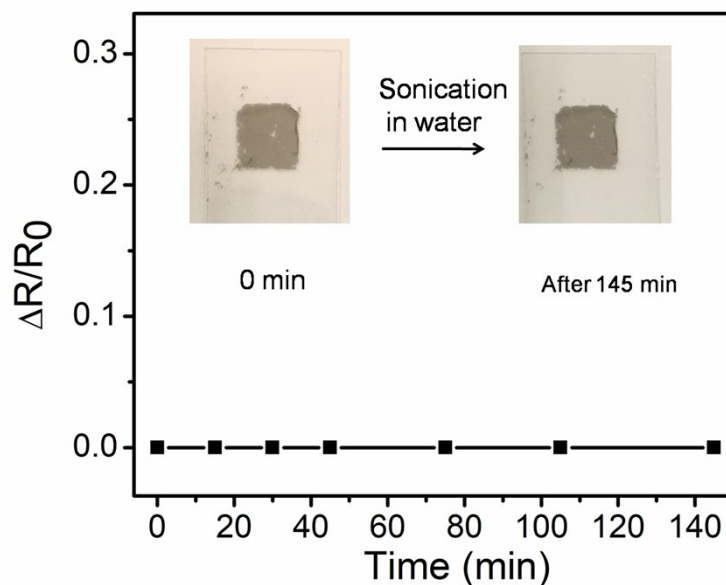

**Figure S9:** Adhesion test between Py-C film and the flexible substrate PET by ultrasonication in water for 145 min. Inset shows the camera image of Py-C film over PET before and after ultrasonication for 145 min.



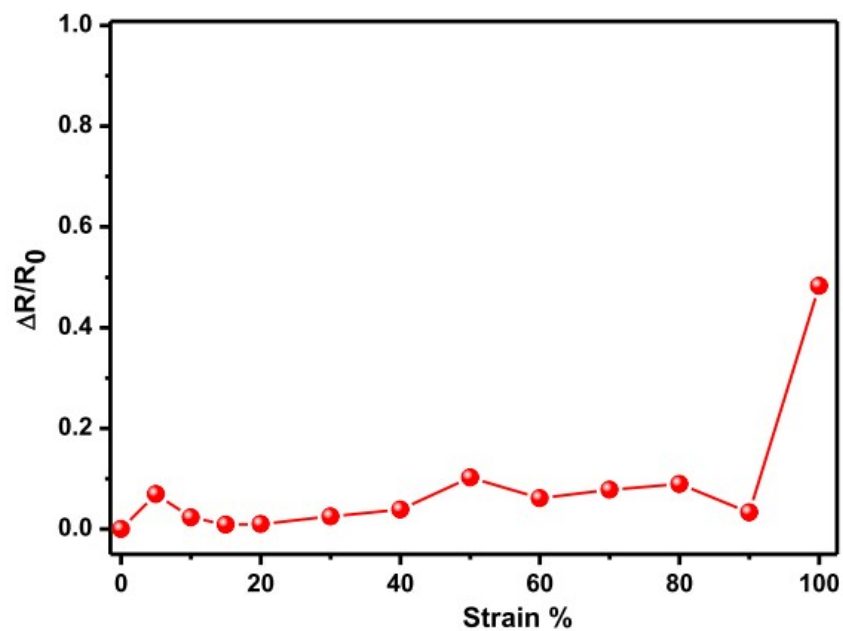

**Figure S10:** Change of resistance of stretchable Py-C thin film electrode with different strain.

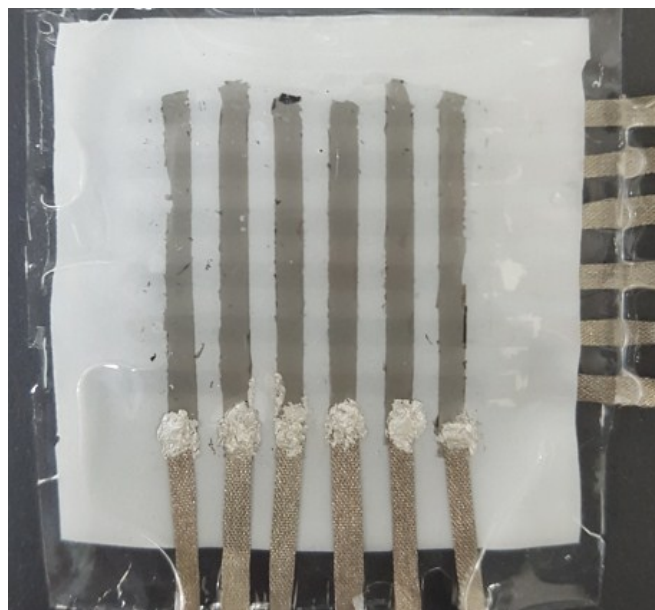

**Figure S11:** 6 × 6 pixelated ACEL device at off state.



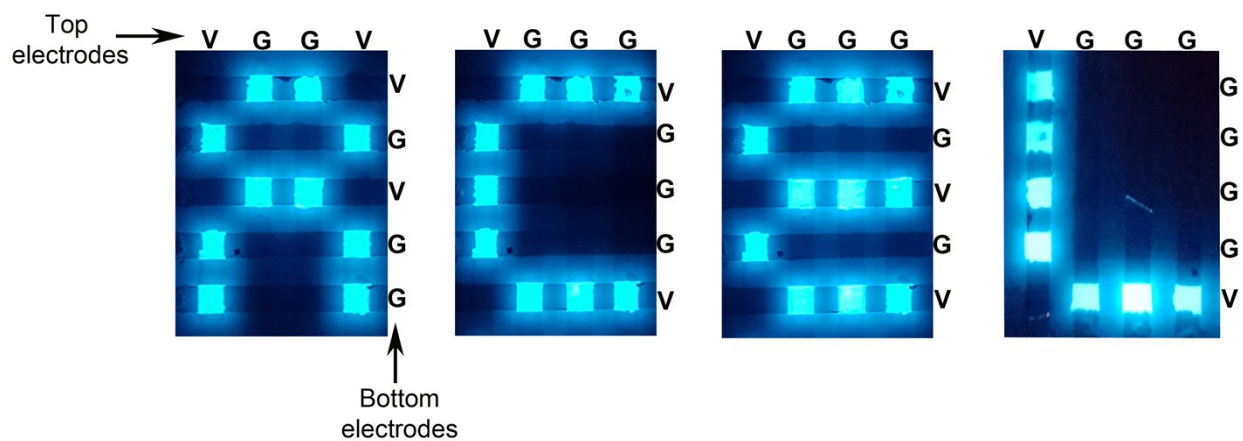

**Figure S12:** Principle of writing different letters in pixelated ACEL device.

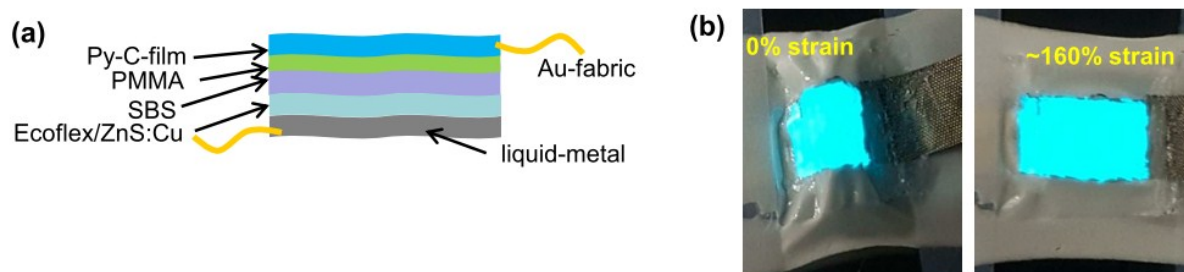

**Figure S13:** (a) Scheme of stretchable ACEL device made of Py-C thin film electrode on prestrained elastomer. (b) Photograph of stretchable ACEL device before (left) and after 160% stretching (right).
